# Supplementary material for: Efficient Gene Transfer to the Central Nervous System by Single-Stranded Anc80L65
Source: PubMed Central journal article supplement — Mol Ther Methods Clin Dev. 2018 Jul 23;10:197–209. doi: 10.1016/j.omtm.2018.07.006 (PMC6083902; doi:10.1016/j.omtm.2018.07.006), 2018-07-23
Supplement: mmc1.pdf [file mmc1.pdf]

**OMTM, Volume 10**

**Supplemental Information**

**Efficient Gene Transfer  
to the Central Nervous System  
by Single-Stranded Anc80L65**

**Eloise Hudry, Eva Andres-Mateos, Eli P. Lerner, Adrienn Volak, Olivia Cohen, Bradley T. Hyman, Casey A. Maguire, and Luk H. Vandenberghe**

### A Liver region bioluminescence

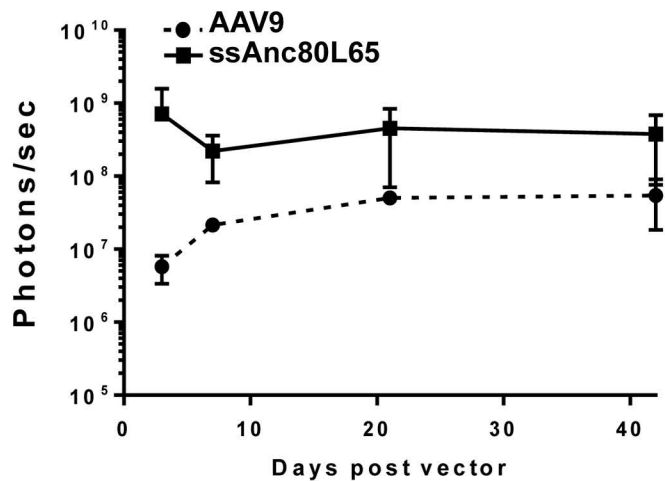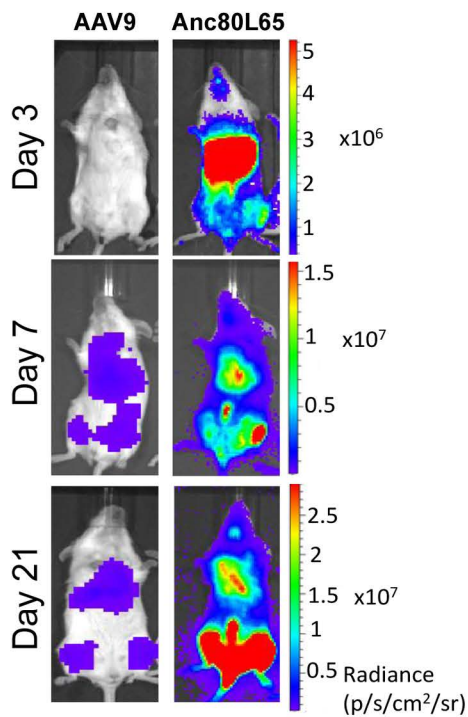

### B Head region bioluminescence

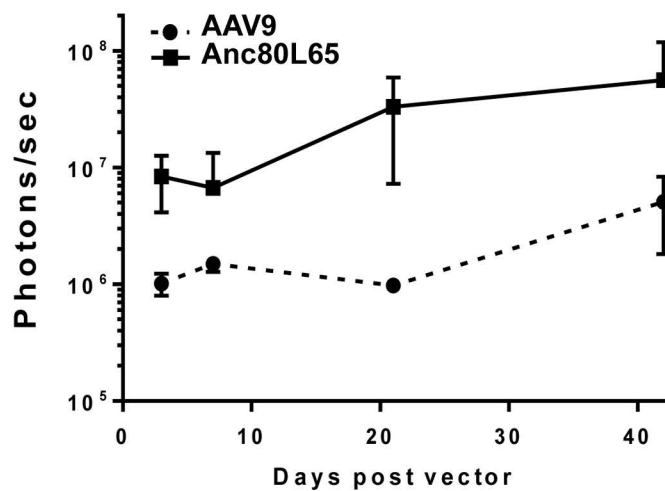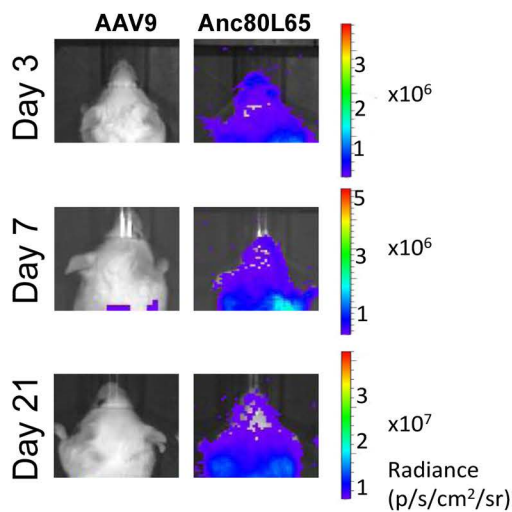

# A - DAY 3

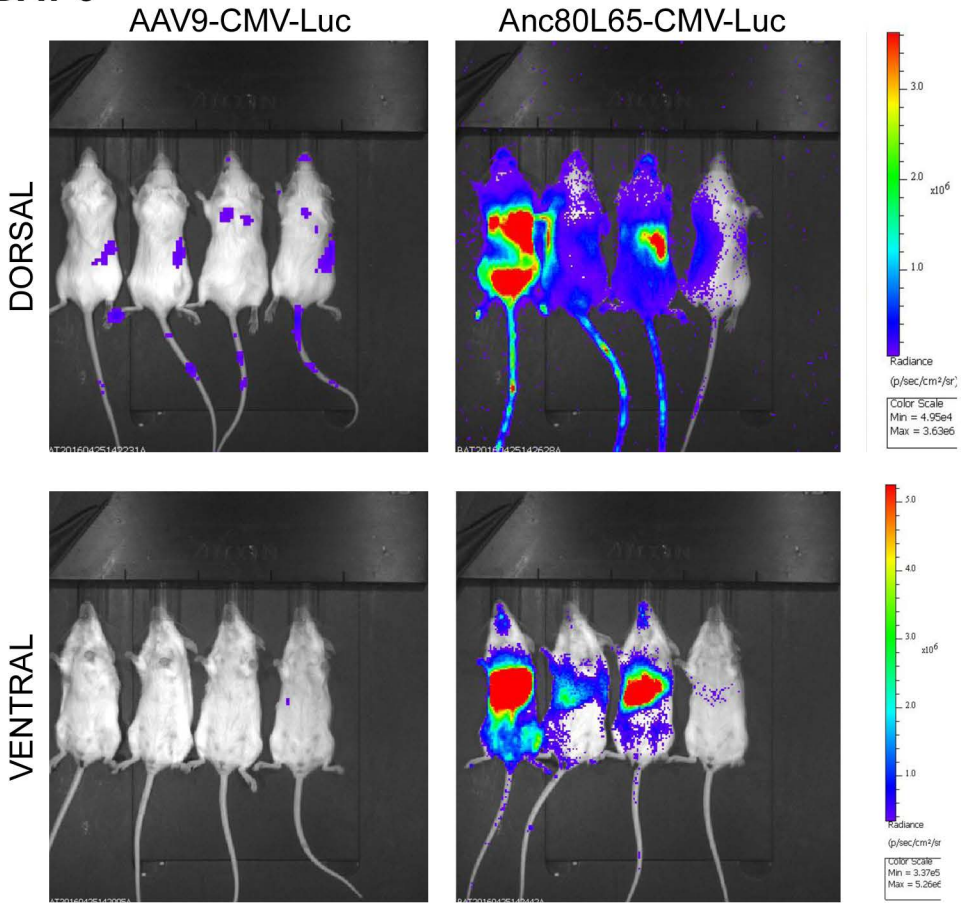

# B - DAY 42

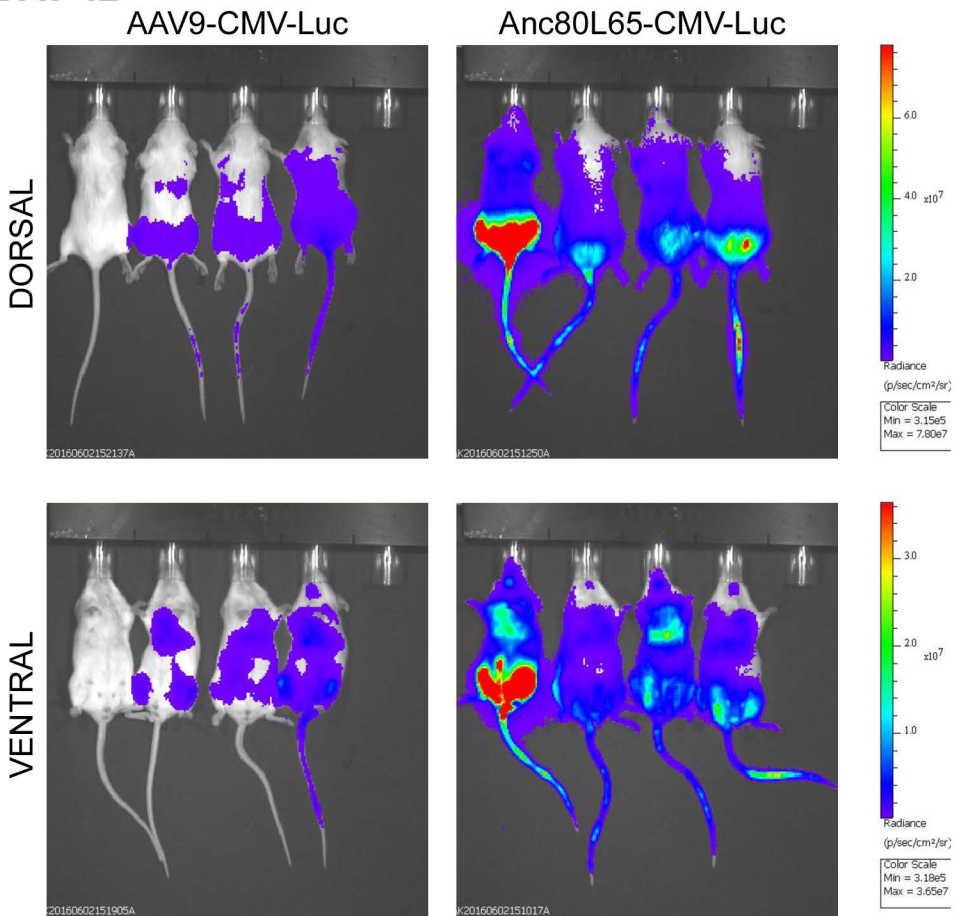

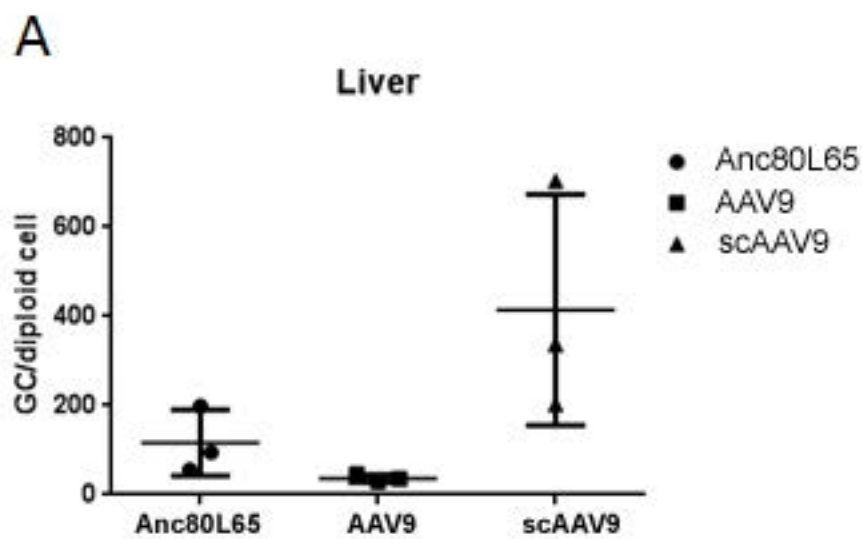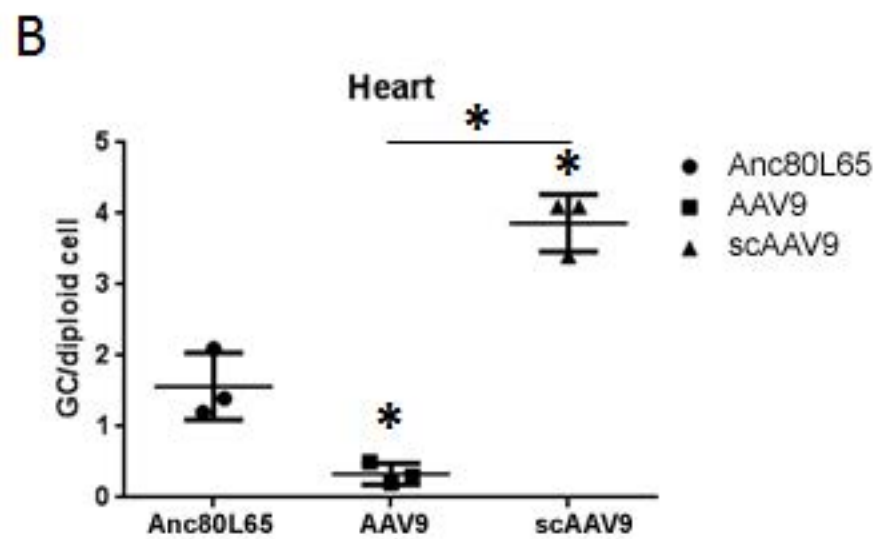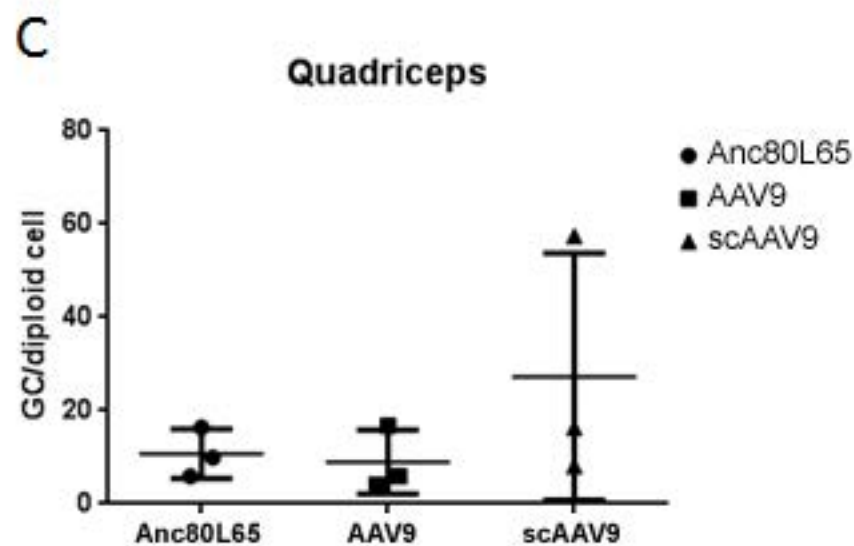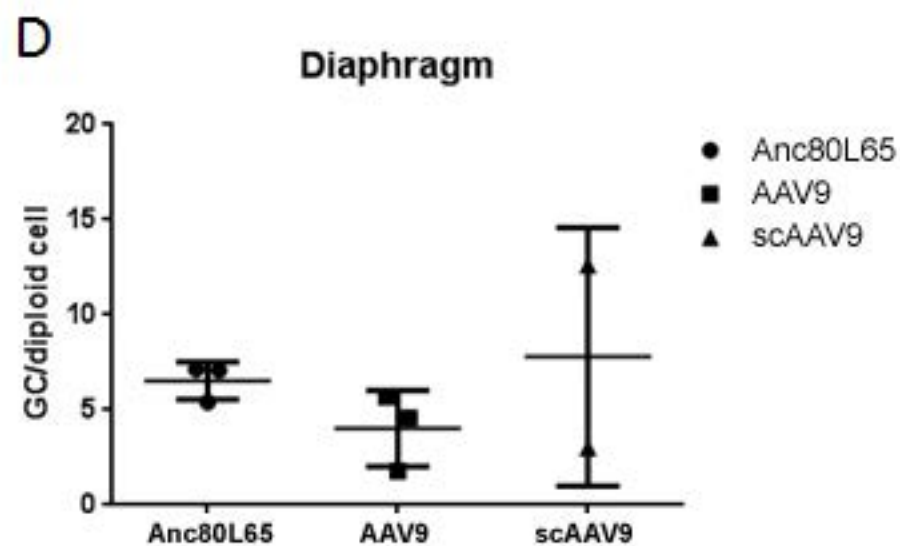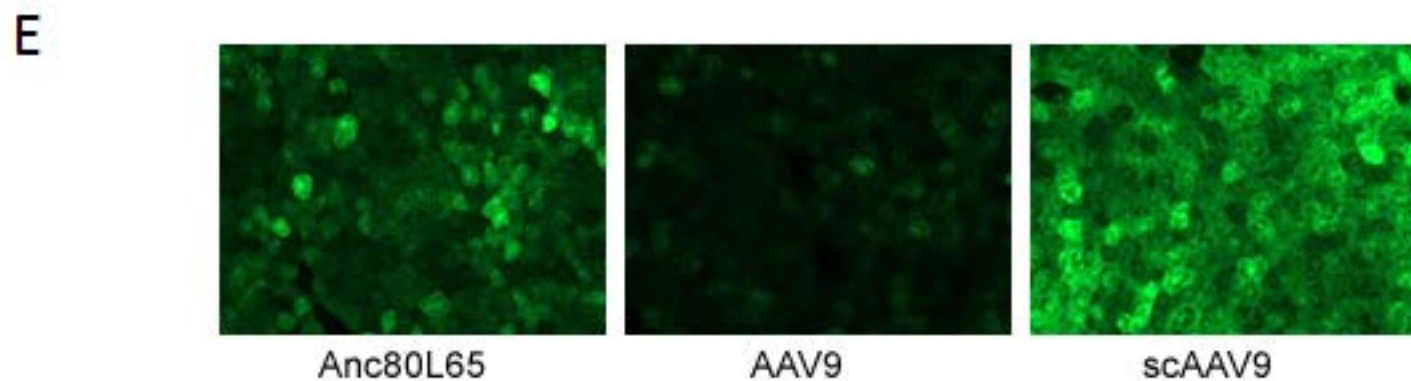

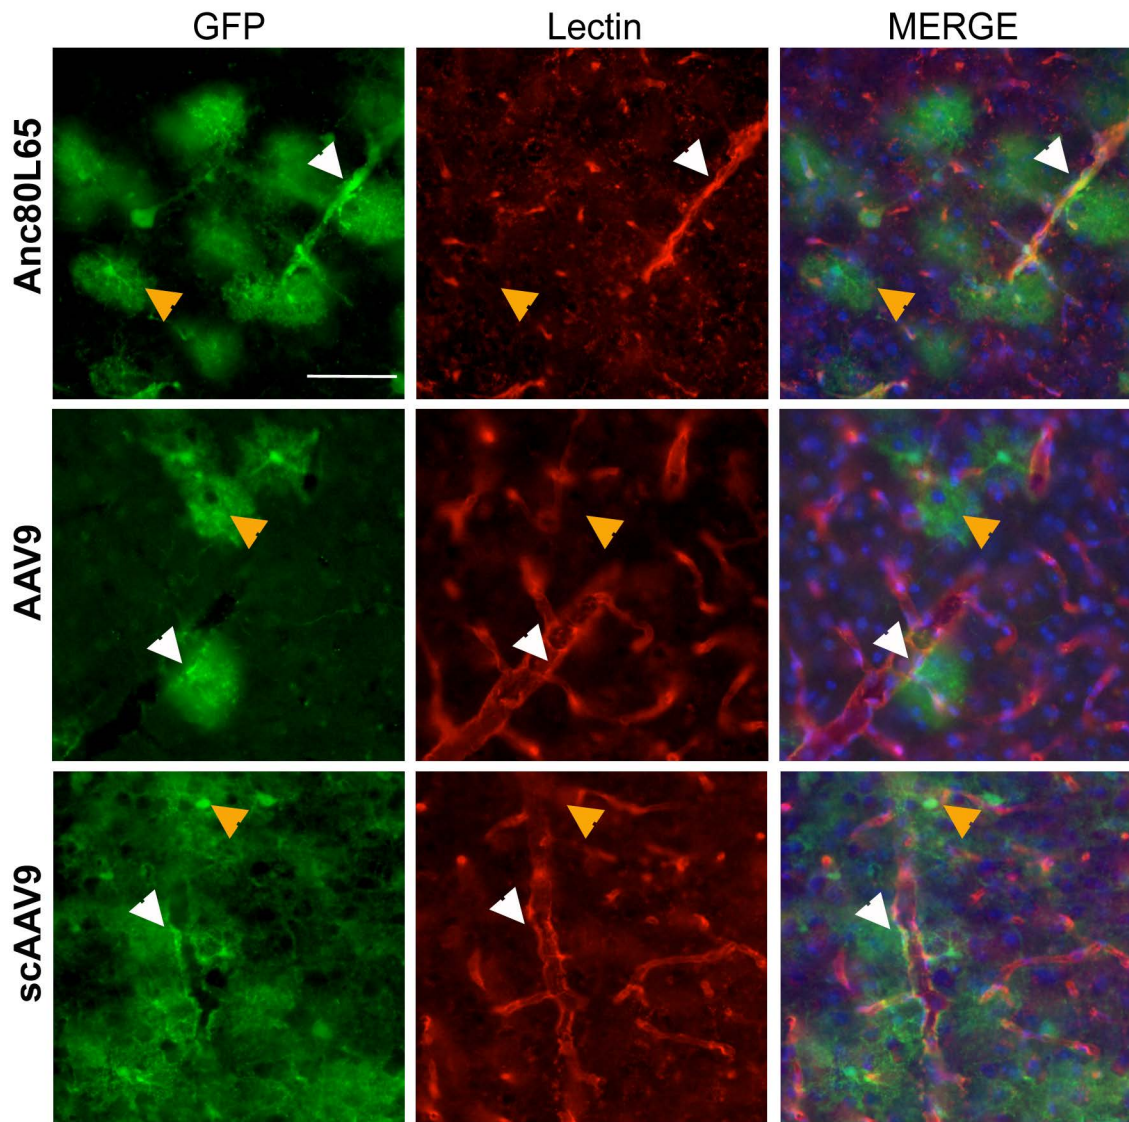

# Microglia

scAAV9

AAV9

Anc80L65

GFP

Iba-1

MERGE

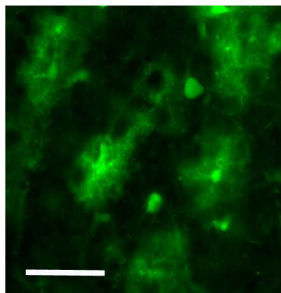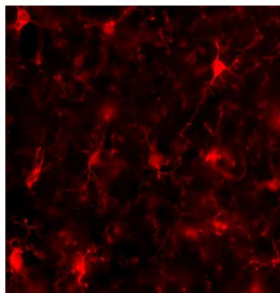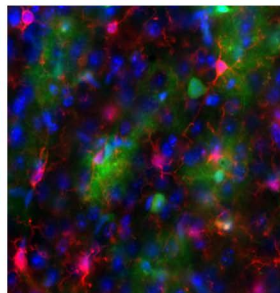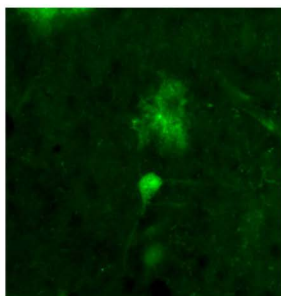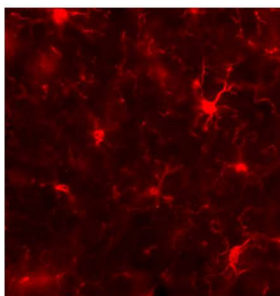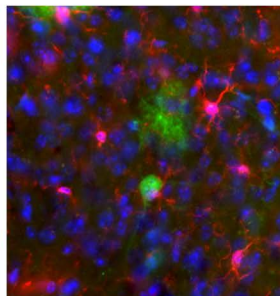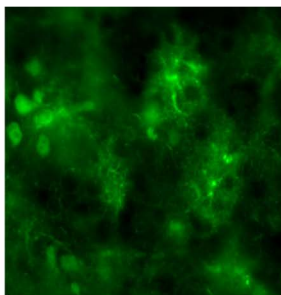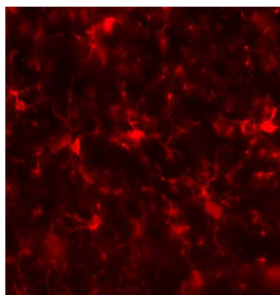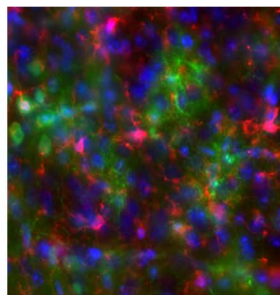

A

Bioluminescence

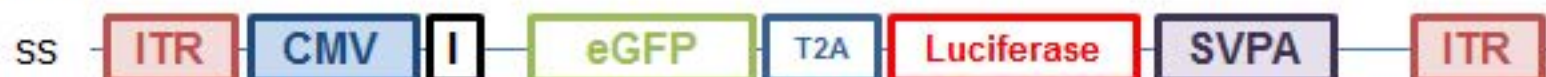

B

Systemic and intracerebral injection

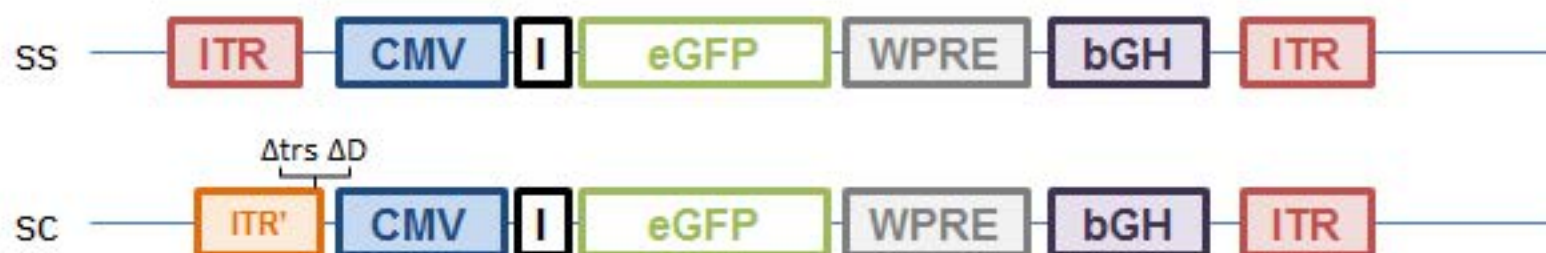

C

| VECTOR                                  | DOSE            | ROUTE OF ADMINISTRATION |
|-----------------------------------------|-----------------|-------------------------|
| <b>BIOLUMINESCENCE</b>                  |                 |                         |
| AAV2/9.CMV.EGFP.T2A.LUCIFERASE.SVPA     | 2E12 gc/kg      | Intravenous             |
| AAV2/Anc80.CMV.EGFP.T2A.LUCIFERASE.SVPA | 2E12 gc/kg      | Intravenous             |
| <b>SYSTEMIC INJECTION</b>               |                 |                         |
| AAV2/9.CMV.EGFP.WPRE.bGH                | 4E13 gc/kg      | Intravenous             |
| AAV2/Anc80.CMV.EGFP.WPRE.bGH            | 4E13 gc/kg      | Intravenous             |
| SC AAV2/9.CMV.EGFP.WPRE.bGH             | 4E13 gc/kg      | Intravenous             |
| <b>INTRACEREBRAL INJECTION</b>          |                 |                         |
| AAV2/9.CMV.EGFP.WPRE.bGH                | 1.5E10 gc/mouse | Intra-striatal          |
| AAV2/Anc80.CMV.EGFP.WPRE.bGH            | 1.5E10 gc/mouse | Intra-striatal          |
| AAV2/9.CMV.EGFP.WPRE.bGH                | 4.5E10 gc/mouse | Intra-ventricular       |
| AAV2/Anc80.CMV.EGFP.WPRE.bGH            | 4.5E10 gc/mouse | Intra-ventricular       |

## SUPPLEMENTAL FIGURES LEGENDS

### **Supplementary Figure 1. Kinetics and localization of bioluminescence signal after intravenous injection of BALB/c with Anc80L65-CMV-FLuc or AAV9-CMV-FLuc.**

Mice were injected with  $2 \times 10^{12}$  gc/kg of vector and imaged at days 3, 7, 21, and 42 post injection. (A) Bioluminescence signal from liver region. A region of interest (ROI) was drawn on each image and photons/sec calculated. Left: graph depicting kinetics of expression. Right: representative images of mice injected with AAV9 or Anc80 at days 3, 7, and 21 post injection. (B) Bioluminescence signal from head region. ROI was drawn on each image and photons/sec calculated. Left: graph depicting kinetics of expression. Right: representative images of mice injected with AAV9 or Anc80L65 at days 3, 7, and 21 post injection.  $n=5$  mice/group.

### **Supplementary Figure 2. Whole-body bioluminescence images at days 3 and 42 post intravenous injection of Anc80L65-CMV-FLuc or AAV9-CMV-FLuc**

Representative bioluminescence images of BALB/c mice injected systemically with  $2 \times 10^{12}$  gc/kg of AAV9-CMV-FLuc or Anc80-CMV-FLuc, at 3 and 42 days after injection in the lateral tail vein.

### **Supplementary Figure 3. Quantification of AAV genome-copy numbers in peripheral tissues after systemic injection with Anc80L65-CMV-eGFP, AAV9-CMV-eGFP and scAAV9-CMV-eGFP**

Genomic DNA qPCR analysis was performed to measure the gc/diploid cell in liver (A), heart (B), quadriceps (C) and diaphragm (D),  $n=3$  mice per group; two-way ANOVA followed by Tukey's multiple comparison test;  $*p<0.05$ . (E) Representative images of eGFP fluorescence signal detected across the liver after intravenous injection of the same dose of Anc80L65, AAV9 and scAAV9 in wild-type mice ( $4 \times 10^{13}$ gc/kg).

### **Supplementary Figure 4. Anc80L65, AAV9 and scAAV9 transduction of intraparenchymal and vessel-associated astrocytes**

Double immunostaining with Lycopersicon Esculentum lectin ("Lectin") and eGFP shows that both astrocytic endfeet and parenchymal astrocytes were equivalently transduced by Anc80L65, AAV9 or scAAV9 after systemic infusion. Scale bar:  $50\mu\text{m}$

### **Supplementary Figure 5. Absence of microglial transduction after intravenous delivery of Anc80L65, AAV9 and scAAV9 harboring a self-complementary genome**

Double immunostaining with Iba-1 and eGFP was performed in order to determine if Anc80L65, AAV9 or AAV9 containing a self-complementary genome (scAAV9) transduced microglial cells. As shown on those representative images, no colocalization between the two markers was detected. Scale bar:  $50\mu\text{m}$

### **Supplementary Figure 6. Vector and experimental design**

(A and B) Schematic representation of the expression cassette used to produce the viral vectors. (A) For the bioluminescence experiments a multicistronic vector with a T2A peptide signal was used. A 133 base pairs chimeric intron (I) and the viral SV40 polyA signal (SVPA) were introduced in the cassette. (B) For the systemic and intracerebral injection, the self-complementary (sc) vector 5' ITR contained a deletion of the D-sequence and the terminal resolution site mutation (trs). The transgene design (CMV.eGFP.WPRE.bGH, 2266 base pairs) was identical for the self-complementary and single stranded vectors, and included a 133 bp chimeric intron (I) and the bovine growth hormone polyA signal (bGH). (C) Table including the vector, dose and route of administration used in all the experiments.
